# Supplementary material
Source: PubMed Central journal article supplement (PMC10036015)
Supplement: medi-102-e33365-s001.pdf [file medi-102-e33365-s001.pdf]

**Supplementary Table 1:** Details of Ayurvedic and Homeopathic immune-booster supplements consumed by chronic liver disease patients and histopathology findings of those developing liver injury

| Immune-booster consumed                 | Number of patients | Liver histopathology (N = 7)   |                        |
|-----------------------------------------|--------------------|--------------------------------|------------------------|
|                                         |                    | Feature                        | Proportion of patients |
| Turmeric, Ashwagandha                   | 1                  |                                |                        |
| Turmeric, Giloy juice                   | 1                  | Ballooning                     | 85.7%                  |
| Arsenicum album 30C                     | 2                  | Cholestasis                    | 57.1%                  |
| Indian Gooseberry decoction             | 3                  | Canalicular and hepatocellular | 50%                    |
| Indian Gooseberry, Guava leaf extract   | 1                  | Necrosis                       | 100%                   |
| Indian Gooseberry, Fenugreek decoction  | 1                  | Focal or spotty type           | 28.6%                  |
| Fenugreek, Turmeric decoction           | 1                  | Bridging type                  | 14.3%                  |
| Multiherbal products (powders, tablets) | 6                  | Confluent type                 | 14.3%                  |
| Malabar nut, neem, turmeric decoction   | 1                  | Multiacinar type               | 42.8%                  |
| Ashwagandha, Turmeric and multiherbal   | 1                  | Steatosis                      | 71.4%                  |
| Indian gooseberry, Malabar nut extracts | 1                  | Eosinophils                    | 100%                   |
|                                         |                    | Moderate severity              | 71.4%                  |
| <b>Total</b>                            | <b>19</b>          |                                |                        |
|                                         |                    | Inflammation type              | Neutrophilic 71.4%     |

|  |  |                      |                                        |
|--|--|----------------------|----------------------------------------|
|  |  | Inflammation pattern | Portal region 57.1%                    |
|  |  | Interface hepatitis  | 57.1%                                  |
|  |  | Fibrosis             | F2 – 14.3%<br>F3 – 28.6%<br>F4 – 57.1% |
