# Supplementary material
Source: PubMed Central journal article supplement (PMC10036015)
Supplement: medi-102-e33365-s002.pdf [file medi-102-e33365-s002.pdf]

**Supplementary Table 2:** Comparison of clinical events between immune-booster-related decompensation and alcohol-associated acute decompensation at baseline and on follow-up at 180 days

| Variable                                | Immune-booster group (N=19) | Alcohol group (N=39) | P value |
|-----------------------------------------|-----------------------------|----------------------|---------|
| <b>Baseline</b>                         |                             |                      |         |
| Age (in years)                          | 55.6±9.4                    | 52.6±9.5             | 0.26    |
| Gender: Males                           | 89.5%                       | 100%                 | 0.04    |
| Child Turcotte Pugh score               | 10.2±1.9                    | 11.4±1.6             | 0.01    |
| Model for end stage liver disease score | 21.6±5.5                    | 26.3±5.1             | 0.002   |
| Ascites                                 | 47.4%                       | 51.3%                | 0.78    |
| Acute kidney injury                     | 10.5%                       | 20.5%                | 0.34    |
| Hepatic encephalopathy                  | 5.3%                        | 41.02%               | 0.005   |
| Jaundice                                | 73.7%                       | 100%                 | <0.001  |
| <b>Follow up (180 days)</b>             |                             |                      |         |
| Ascites                                 | 57.9%                       | 41.02%               | 0.23    |
| Acute variceal bleed                    | 36.8%                       | 33.3%                | 0.79    |
| Acute kidney injury                     | 52.6%                       | 30.8%                | 0.11    |
| Hepatic encephalopathy                  | 42.1%                       | 38.5%                | 0.80    |
