# Supplementary material
Source: PubMed Central journal article supplement (PMC10036015)

**Supplementary Figure 1:** Kaplan-Meier survival analysis and proportion of patients surviving at the end of 180 days follow up between immune-booster related and alcohol-associated decompensation of cirrhosis.

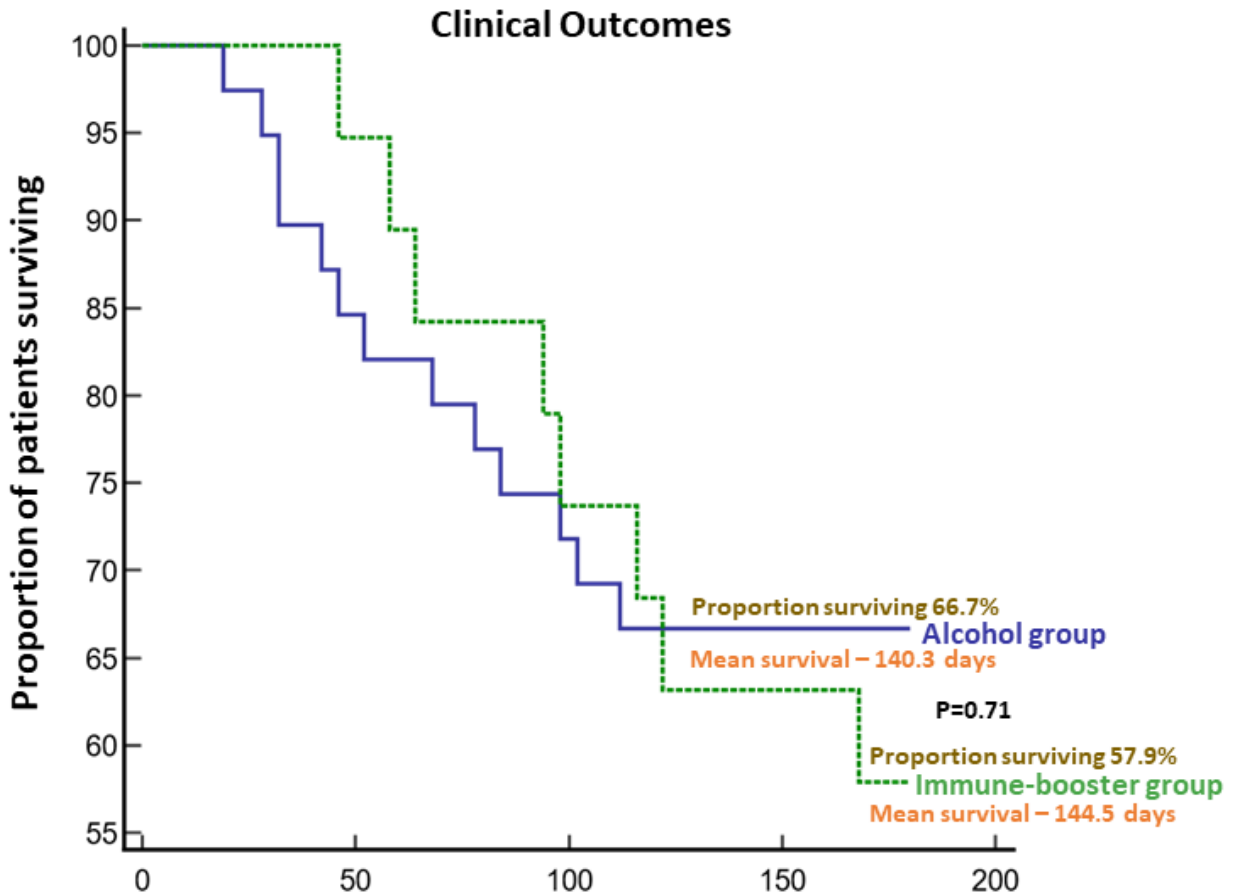

Supplement: medi-102-e33365-s003.pdf [file medi-102-e33365-s003.pdf]
